# Supplementary material for: Ultrafast colorimetric detection of Cr(vi) using Fe3O4@polydopamine/Prussian blue composites as a highly efficient peroxidase mimic
Source: Royal Society of Chemistry journal article supplement (doi:10.1039/d2ay01849g), 2022-12-09
Supplement: d2ay01849g1.pdf [file d2ay01849g1.pdf]

Supporting information

**Ultrafast colorimetric detection of Cr(VI) using  
Fe<sub>3</sub>O<sub>4</sub>@polydopamine/prussian blue composite as  
highly-efficient peroxidase mimic**

Xianyuan Xu, Jingfang Guo, Zhen Lei\*

School of Chemistry and Environmental Engineering, Wuhan Institute of Technology,

Wuhan, 430205, PR China

\*Corresponding author:

E-mail: leizhen930@wit.edu.cn

**Table of Contents**

**1. Additional Figure S1-S6**

**2. Additional Table S1**

**3. Additional References**

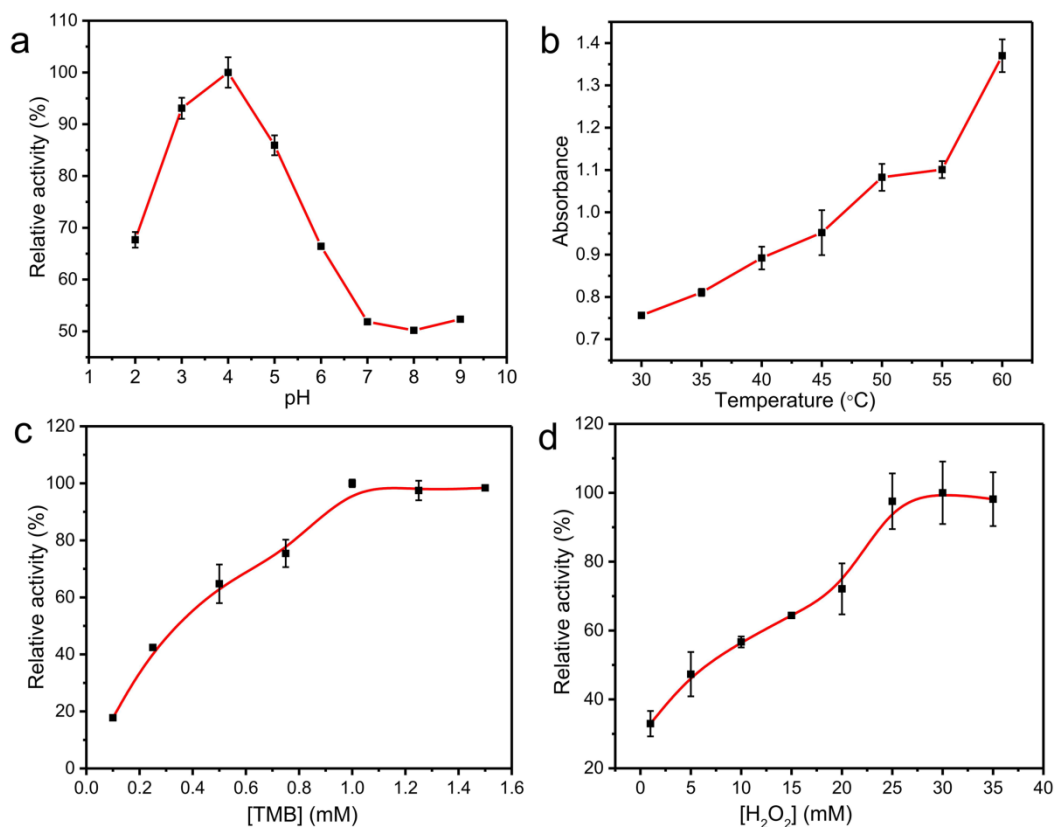

**Fig. S1** The effects of experiment conditions on the peroxidase-like activity of  $\text{Fe}_3\text{O}_4@PDA/PB$  composites: (a) pH, (b) temperature, (c) the concentration of TMB and (d) the concentration of  $\text{H}_2\text{O}_2$ .

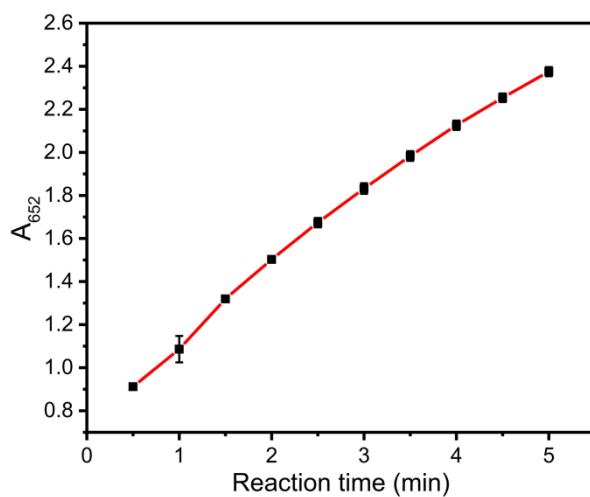

**Fig. S2**  $A_{652}$  of the  $\text{Fe}_3\text{O}_4@PDA/PB+TMB+H_2O_2$  reaction system as a function of reaction time.

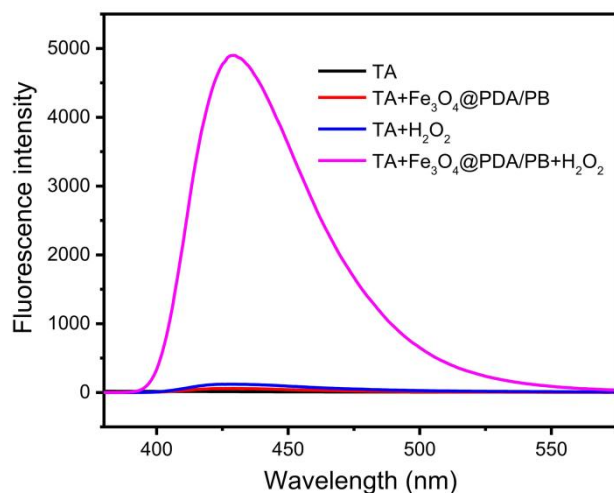

**Fig. S3** Fluorescence emission spectra of TAOH from different reaction systems for inferring the catalytic mechanism of the  $\text{Fe}_3\text{O}_4@PDA/PB$  composites.

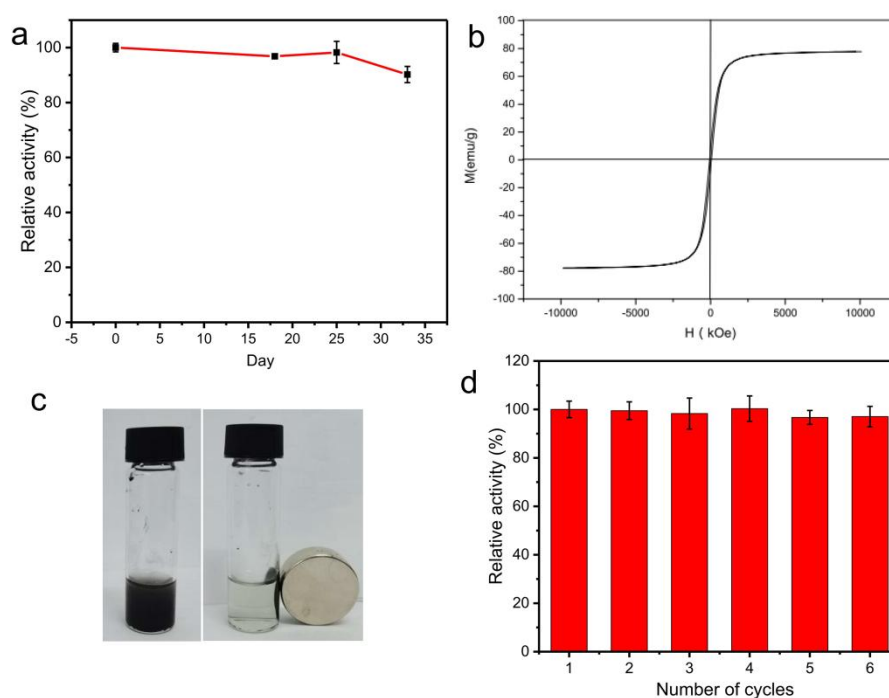

**Fig. S4** (a) The relative activity of  $\text{Fe}_3\text{O}_4@PDA/PB$  composites during the storage for 33 days at 4 °C. (b) Magnetic hysteresis curve of  $\text{Fe}_3\text{O}_4$  NPs (provided by the supplier). (c) Photograph of  $\text{Fe}_3\text{O}_4@PDA/PB$  composites before and after magnetic treatment for 1 min. (d) The relative activity of  $\text{Fe}_3\text{O}_4@PDA/PB$  composites for six consecutive cycles.

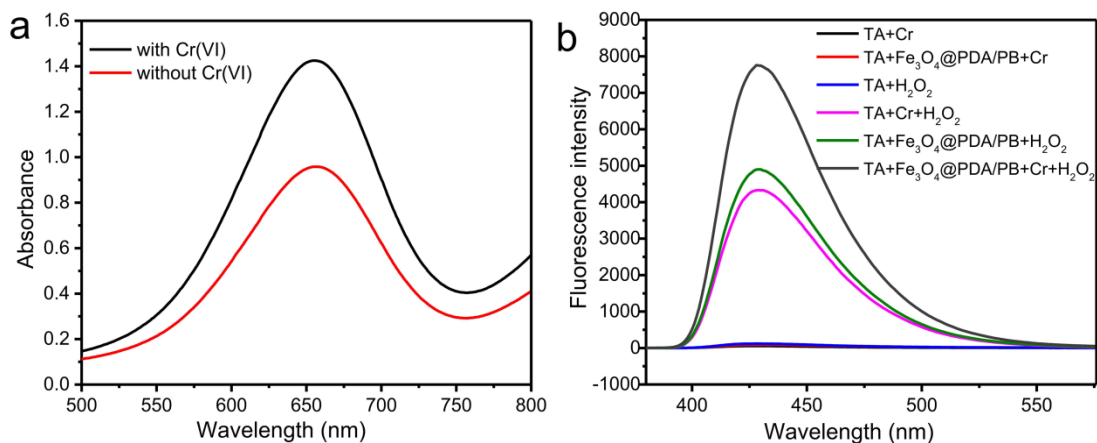

**Fig. S5** (a) UV-vis absorption spectra of the Fe<sub>3</sub>O<sub>4</sub>@PDA/PB+TMB+H<sub>2</sub>O<sub>2</sub> reaction system in the absence and presence of Cr(VI). (b) Fluorescence emission spectra of TAOH from different reaction systems to explain the detection principle of Cr(VI).

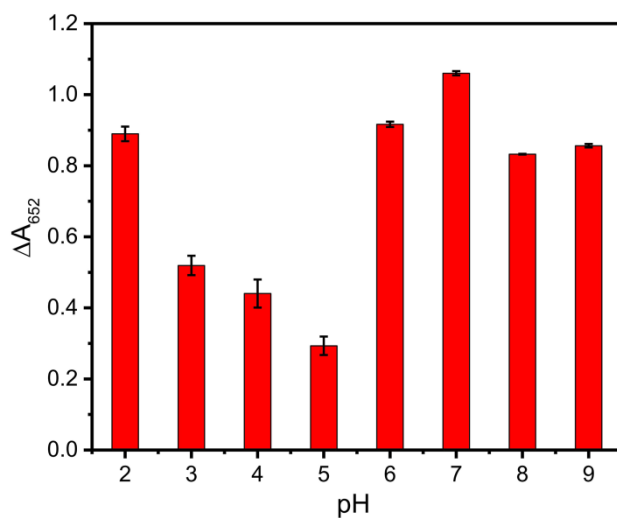

**Fig. S6**  $\Delta A_{652}$  response of the Fe<sub>3</sub>O<sub>4</sub>@PDA/PB+TMB+H<sub>2</sub>O<sub>2</sub> reaction system in the presence of Cr(VI) at different pH.

## 2. Additional Table S1

**Table S1** Comparison of the peroxidase-like activity (kinetic parameters and conditions) of Fe<sub>3</sub>O<sub>4</sub>@PDA/PB with others.

| Catalysts                                             | Substrate                     | K <sub>m</sub> | V <sub>max</sub> (M s <sup>-1</sup> ) | pH   | temperature | Ref  |
|-------------------------------------------------------|-------------------------------|----------------|---------------------------------------|------|-------------|------|
| HRP                                                   | TMB                           | 0.434          | 1×10 <sup>-7</sup>                    | 4.0  | 40 °C       | [1]  |
|                                                       | H <sub>2</sub> O <sub>2</sub> | 3.70           | 8.71×10 <sup>-8</sup>                 |      |             |      |
| CuS-BSA                                               | TMB                           | 0.2            | 2.2×10 <sup>-8</sup>                  | 3.9  | 25 °C       | [2]  |
|                                                       | H <sub>2</sub> O <sub>2</sub> | 0.014          | 2×10 <sup>-8</sup>                    |      |             |      |
| PNPG-PEG                                              | TMB                           | 0.2828         | 3.0276×10 <sup>-9</sup>               | 4.0  | 35 °C       | [3]  |
|                                                       | H <sub>2</sub> O <sub>2</sub> | 0.0799         | 2.467×10 <sup>-9</sup>                |      |             |      |
| CoFe <sub>2</sub> O <sub>4</sub> /H <sub>2</sub> PPOP | TMB                           | 0.075          | 6.54×10 <sup>-5</sup>                 | 3.35 | 35 °C       | [4]  |
|                                                       | H <sub>2</sub> O <sub>2</sub> | 2.68           | 7.44×10 <sup>-5</sup>                 |      |             |      |
| MoS <sub>2</sub>                                      | TMB                           | 0.387          | 7.23×10 <sup>-8</sup>                 | 4.0  | 25 °C       | [5]  |
|                                                       | H <sub>2</sub> O <sub>2</sub> | 0.116          | 2.42×10 <sup>-8</sup>                 |      |             |      |
| CS-MoSe <sub>2</sub> NS                               | TMB                           | 1.317          | 46.85×10 <sup>-8</sup>                | 4.0  | 25 °C       | [6]  |
|                                                       | H <sub>2</sub> O <sub>2</sub> | 12.89          | 23.26×10 <sup>-8</sup>                |      |             |      |
| PBMNPs                                                | TMB                           | 0.307          | 1.06×10 <sup>-6</sup>                 | 4.6  | 25 °C       | [7]  |
|                                                       | H <sub>2</sub> O <sub>2</sub> | 323.6          | 1.17×10 <sup>-6</sup>                 |      |             |      |
| Au-NPFe <sub>2</sub> O <sub>3</sub> NC                | TMB                           | 0.0429         | 5.882×10 <sup>-8</sup>                | 3.5  | 25 °C       | [8]  |
|                                                       | H <sub>2</sub> O <sub>2</sub> | 138.5          | 4.770×10 <sup>-8</sup>                |      |             |      |
| Mesoporous<br>γ-Fe <sub>2</sub> O <sub>3</sub>        | TMB                           | 0.0997         | 5.20×10 <sup>-7</sup>                 | 3.5  | 25 °C       | [9]  |
|                                                       | H <sub>2</sub> O <sub>2</sub> | 144.30         | 1.84×10 <sup>-8</sup>                 |      |             |      |
| Mesoporous<br>α-Fe <sub>2</sub> O <sub>3</sub>        | TMB                           | 0.5304         | 5.43×10 <sup>-8</sup>                 | 3.5  | 25 °C       | [9]  |
|                                                       | H <sub>2</sub> O <sub>2</sub> | 127.92         | 3.77×10 <sup>-8</sup>                 |      |             |      |
| IONF_250                                              | TMB                           | 0.24           | 3.07×10 <sup>-8</sup>                 | 3.5  | 25 °C       | [10] |
|                                                       | H <sub>2</sub> O <sub>2</sub> | 150.47         | 3.07×10 <sup>-8</sup>                 |      |             |      |
| IO-MC                                                 | TMB                           | 0.242          | 1.93×10 <sup>-8</sup>                 | 4.0  | 25 °C       | [11] |
|                                                       | H <sub>2</sub> O <sub>2</sub> | 14.9           | 1.64×10 <sup>-8</sup>                 |      |             |      |
| Fe <sub>3</sub> O <sub>4</sub> @PDA/PB                | TMB                           | 0.1182         | 16.17×10 <sup>-8</sup>                | 4.0  | 30 °C       | This |
|                                                       | H <sub>2</sub> O <sub>2</sub> | 10.70          | 16.19×10 <sup>-8</sup>                |      |             | work |

### 3. Additional References

- 1 L. Gao, J. Zhuang, L. Nie, J. Zhang, Y. Zhang, N. Gu, T. Wang, J. Feng, D. Yang and S. Perrett, *Nat. Nanotechnol.*, 2007, **2**, 577–583.
- 2 A. Swaidan, P. Borthakur, P. K. Boruah, M. R. Das, A. Barras, S. Hamieh, J. Toufaily, T. Hamieh, S. Szunerits and R. Boukherroub, *Sens. Actuators, B*, 2019, **294**, 253–262.
- 3 S. Ghayyem, A. Swaidan, A. Barras, M. Dolci, F. Faridbod, S. Szunerits and R. Boukherroub, *Talanta*, 2021, **226**, 122082.
- 4 X. Guo, F. Yang, L. Jing, J. Li, Y. Li, R. Ding, B. Duan and X. Zhang, *J. Hazard. Mater.*, 2022, **431**, 128621.
- 5 P. Borthakur, P. K. Boruah, M. R. Das, S. B. Artemkina, P. A. Poltarak and V. E. Fedorov, *New J. Chem.*, 2018, **42**, 16919–16929.
- 6 L. Huang, Q. Zhu, J. Zhu, L. Luo, S. Pu, W. Zhang, W. Zhu, J. Sun and J. Wang, *Inorg. Chem.*, 2019, **58**, 1638–1646.
- 7 X. Zhang, S. Gong, Y. Zhang, T. Yang, C. Wang and N. Gu, *J. Mater. Chem.*, 2010, **20**, 5110–5116.
- 8 M. K. Masud, S. Yadav, M. N. Islam, N.-T. Nguyen, C. Salomon, R. Kline, H. R. Alamri, Z. A. Allothman, Y. Yamauchi and M. S. A. Hossain, *Anal. Chem.*, 2017, **89**, 11005–11013.
- 9 M. K. Masud, J. Kim, M. M. Billah, K. Wood, M. J. Shiddiky, N. T. Nguyen, R. K. Parsapur, Y. V. Kaneti, A. A. Alshehri and Y. G. Alghamidi, *J. Mater. Chem. B*, 2019, **7**, 5412–5422.
- 10 S. Tanaka, M. K. Masud, Y. V. Kaneti, M. J. Shiddiky, A. Fatehmulla, A. M. Aldhafiri, W. A. Farooq, Y. Bando, M. S. A. Hossain and Y. Yamauchi, *ChemNanoMat*, 2019, **5**, 506–513.
- 11 M. A. Wahab, S. A. Hossain, M. K. Masud, H. Park, A. Ashok, M. Mustapić, M. Kim, D. Patel, M. Shahbazi and M. S. A. Hossain, *Sens. Actuators, B*, 2022, **366**, 131980.
